# Supplementary material for: Melt Electrospinning Writing of Magnetic Microrobots
Source: PubMed Central journal article supplement (PMC7856894; doi:10.1002/advs.202003177), 2021-01-04
Supplement: ADVS-8-2003177-s001.pdf [file ADVS-8-2003177-s001.pdf]

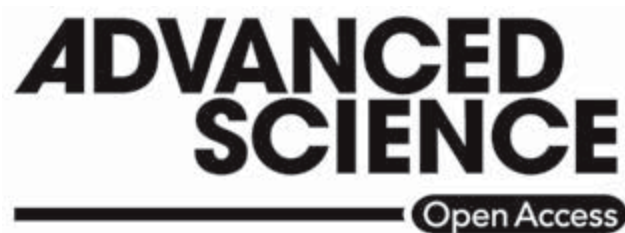

## Supporting Information

for *Adv. Sci.*, DOI: 10.1002/advs.202003177

### Melt Electrospinning Writing of Magnetic Microrobots

*Yingchun Su, Tian Qiu, Wen Song, Xiaojun Han,\* Mengmeng Sun, Zhao Wang, Hui Xie, Mingdong Dong,\* and Menglin Chen\**

## Supporting Information

### **Melt Electrospinning Writing of Magnetic Microrobots**

*Yingchun Su, Tian Qiu, Wen Song, Xiaojun Han, \* Mengmeng Sun, Zhao Wang, Hui Xie, Mingdong Dong,\* and Menglin Chen\**

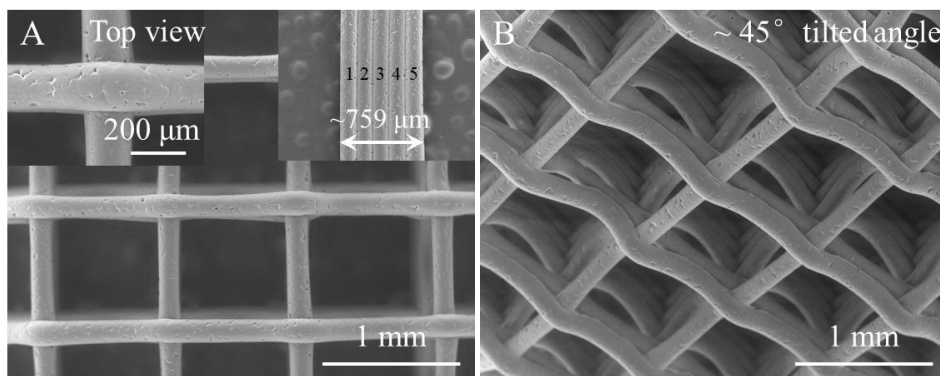

**Figure S1.** The SEM images of PCL fibers.  $0^\circ$  (A) and  $\sim 45^\circ$  (B) tilted angle with the tip-collector distance of 4 mm, the applied voltage of 3.5 kV, the air pressure of 0.25 bar, the stage speed of 100 mm/min and the needle diameter of 0.90 mm.

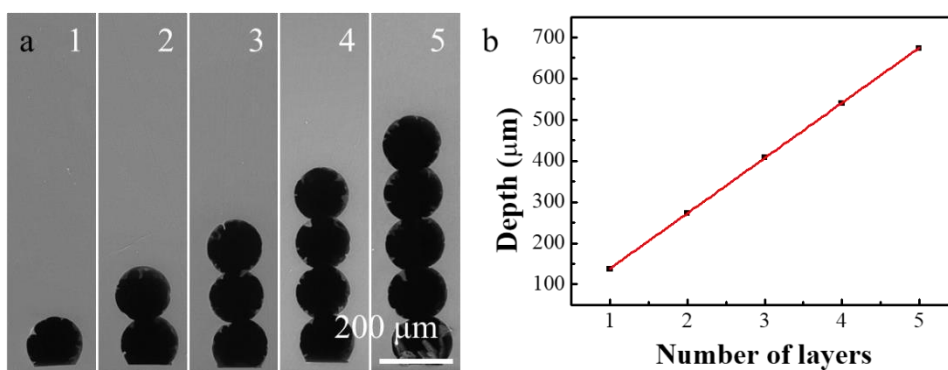

**Figure S2.** Characterization of PDMS channels made from fibers with different layers. (A) SEM images of PDMS channels made from fibers with different layers. (B) The depth of PDMS channels against different layers and linear fitting curve.

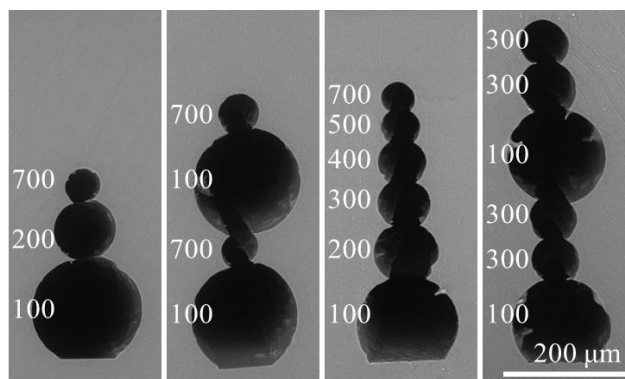

**Figure S3.** SEM images of different designed PDMS asymmetric channels.

**Table S1.** The elemental analysis of PCL/Fe<sub>3</sub>O<sub>4</sub> asymmetric magnetic robot.

| Elements | wt%   | at%   |
|----------|-------|-------|
| C        | 57.69 | 70.58 |
| O        | 27.90 | 25.63 |
| Fe       | 14.40 | 3.79  |

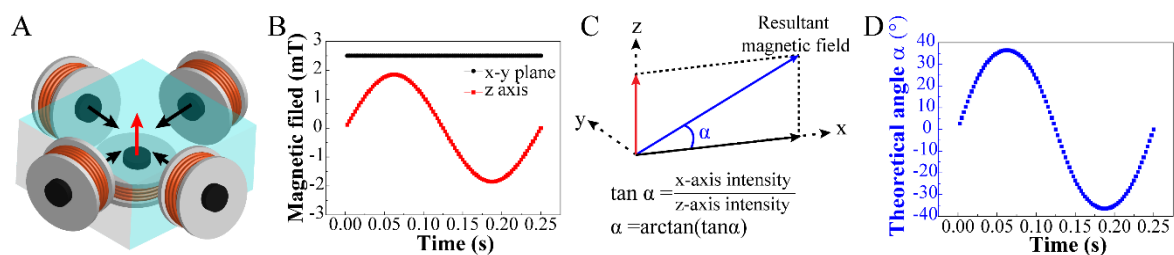

**Figure S4.** Magnetic manipulation system and corresponding magnetic field. (A) Schematic of magnetic system and corresponding magnetic field; (B) The intensity curve along different time for the component propulsion magnetic field in x-y plane and along z axis; (C) Schematic diagram to calculate the angle  $\alpha$  between resultant magnetic field and x axis; (D) The theoretical angle  $\alpha$  vs times.

**Table S2.** A summary of recent literatures about magnetic microrobots.

| Type of magnetic robot                                                                           | Size                                                                                                                                                                   | Actuation methods         | The fastest velocity          | Magnetic field                                                                             | Refs.     |
|--------------------------------------------------------------------------------------------------|------------------------------------------------------------------------------------------------------------------------------------------------------------------------|---------------------------|-------------------------------|--------------------------------------------------------------------------------------------|-----------|
| Tadpole-like PCL/Fe <sub>3</sub> O <sub>4</sub> microrobot                                       | ~ 60 $\mu\text{m}$ in thickness and $276 \pm 50 \mu\text{m}$ in length                                                                                                 | Rotating magnetic field   | $2.0 \pm 0.1 \text{ mm/s}$    | 1.85 mT magnetic field with a frequency 20 Hz                                              | This work |
|                                                                                                  |                                                                                                                                                                        | Propulsion magnetic field | $340.4 \pm 6.2 \mu\text{m/s}$ |                                                                                            |           |
| Burr-like porous spherical microrobot                                                            | Diameter ranged from 70 to 90 $\mu\text{m}$                                                                                                                            | Field gradient            | ~1.5 mm/s                     | 20 T/m gradient                                                                            | [1]       |
| Bilayer hydrogel microsheet robot                                                                | 80 $\mu\text{m}$ thick and 800-1000 $\mu\text{m}$ long                                                                                                                 | Field gradient            | ~1.2 mm/min                   | 20 mT magnetic field and 2 mT/m gradient                                                   | [2]       |
| A silicon carbonitride ceramic cylindrical microrobot                                            | 42 $\mu\text{m}$ long                                                                                                                                                  | Rotating magnetic field   | 85.56 $\mu\text{m/s}$         | 22 mT magnetic field with a frequency 7 Hz                                                 | [3]       |
| A soft two-tailed microrobot with a magnetic head and two collinear, unequal, and opposite tails | A 215 $\mu\text{m}$ long first tail; the second tail length ranges of 215 - 430 $\mu\text{m}$ ; 25 and 80 $\mu\text{m}$ in minor and major head diameter, respectively | Oscillated field          | 35.2 $\mu\text{m/s}$          | 18 mT magnetic field with a frequency 6 Hz and 5 T/m gradient                              | [4]       |
| Superparamagnetic microparticle chain                                                            | 5 $\mu\text{m}$ in diameter                                                                                                                                            | Rotating magnetic field   | $6.9 \pm 2.9 \mu\text{m/s}$   | <10 mT magnetic field with a frequency 5 Hz; tilt angle of 40° and precession angle of 45° | [5]       |

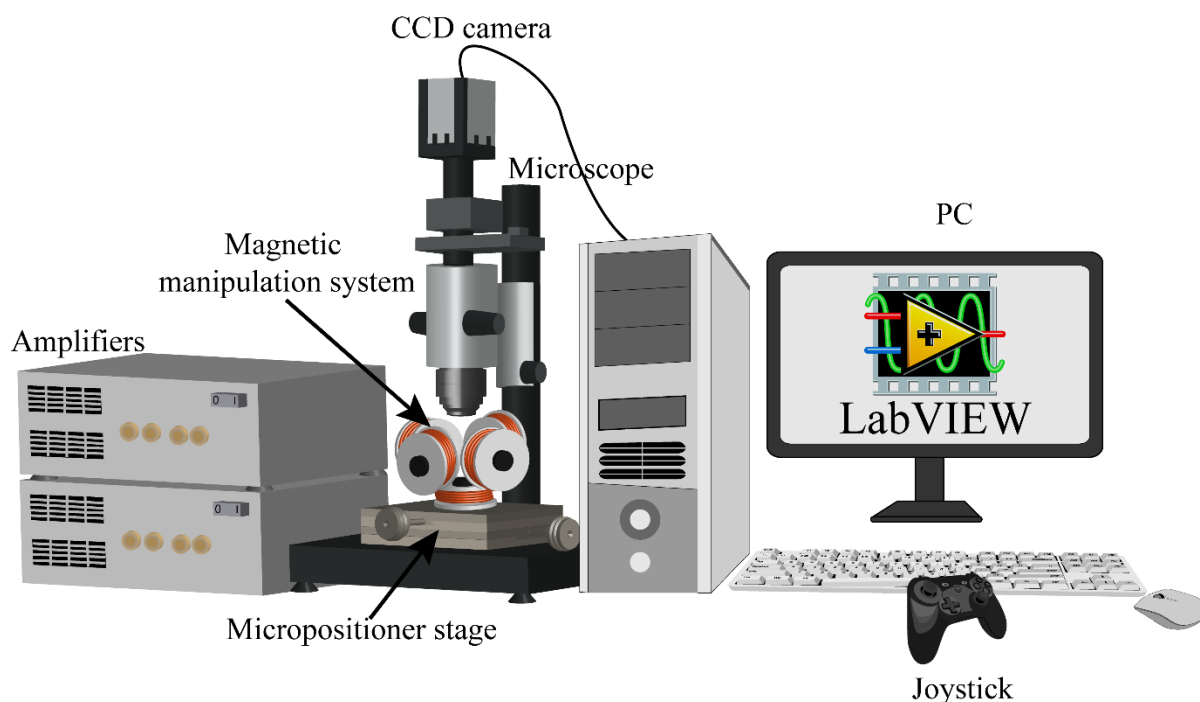**Figure S5.** Schematic of magnetic drive setup.

**References**

- [1] J. Y. Li, X. J. Li, T. Luo, R. Wang, C. C. Liu, S. X. Chen, D. F. Li, J. B. Yue, S. H. Cheng, D. Sun, *Sci. Robot.* **2018**, *3*, eaat8829.
- [2] D. I. Kim, H. Lee, S. H. Kwon, Y. J. Sung, W. K. Song, S. Park, *Adv. Healthc. Mater.* **2020**, *9*, 2000118.
- [3] K. W. Gyak, S. Jeon, L. Ha, S. Kim, J. Y. Kim, K. S. Lee, H. Choi, D.P. Kim, *Adv. Healthc. Mater.* **2019**, *8*, 1900739.
- [4] I. S. M. Khalil, A. F. Tabak, Y. Hamed, M. E. Mitwally, M. Tawakol, A. Klingner, M. Sitti, *Adv. Sci.* **2018**, *5*, 700461.
- [5] B. Yigit, Y. Alapan, M. Sitti, *Adv. Sci.*, **2019**, *6*, 1801837.
